# Supplementary material
Source: MDPI journal article supplement (https://www.mdpi.com/2075-163X/10/7/581)
Supplement: s1 [file s1]

**Table S1.** Mineral phases detected by the XRD analysis listed in order of decreasing abundance. In italic minerals present in minor/trace amount.

| Sample           | Mineral phases                                                                |
|------------------|-------------------------------------------------------------------------------|
| ROV6             | quartz, K-feldspar, sulfur, anorthoclase, plagioclase, <i>phyllosilicates</i> |
| ST2BNR1          | K-feldspar, quartz, sulfur, <i>barite</i>                                     |
| ST2BNR3          | K-feldspar, sulfur, quartz, <i>barite, illite, kaolinite, rutile</i>          |
| ST9BNR2B (inner) | quartz, pyrite, illite, <i>calcite</i>                                        |
| ST9BNR2B (outer) | quartz low, <i>pyrite, gypsum</i>                                             |
| ST9BNR2C (inner) | K-feldspar, quartz, plagioclase, <i>phyllosilicates</i>                       |
| ST9BNR2C (outer) | quartz, K-feldspar <i>illite, sulfur</i>                                      |
