# Supplementary material
Source: MDPI journal article supplement (https://www.mdpi.com/2075-163X/10/7/581)
Supplement: s1 [file s1]

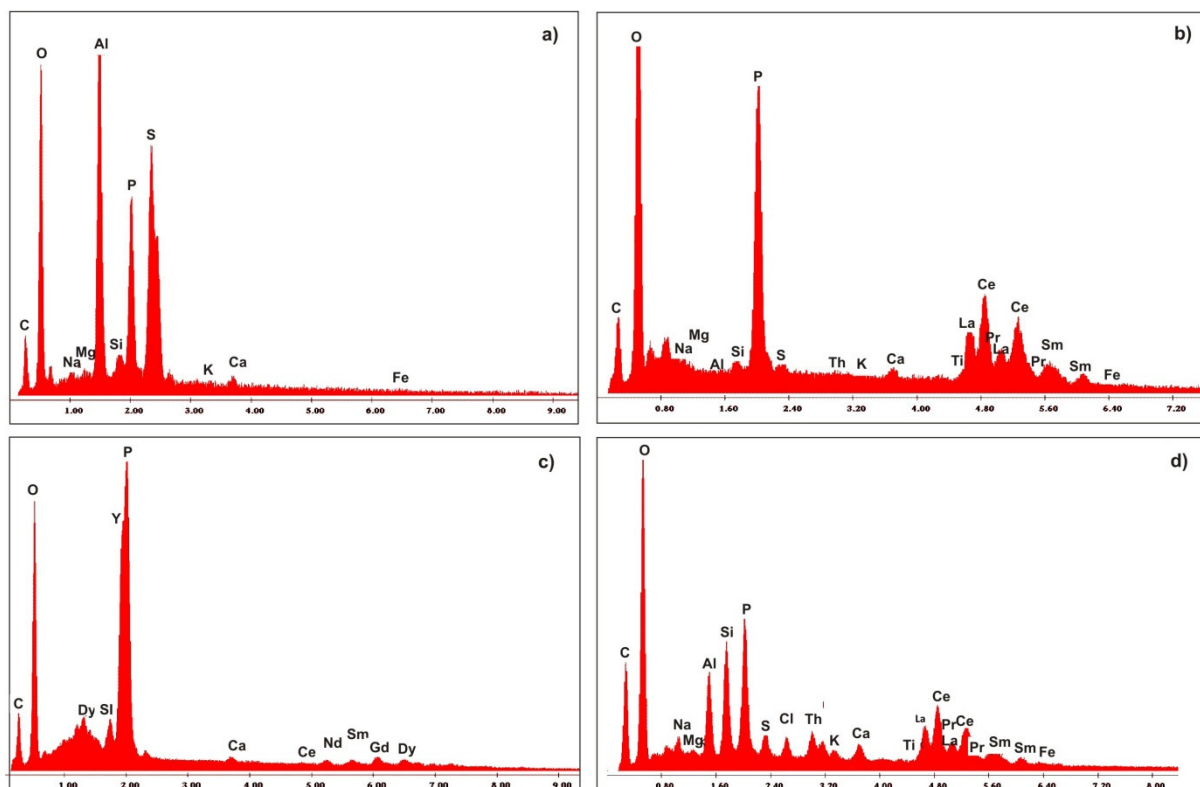

**Figure S1.** EDS spectra of APS minerals (a), monazite (b), xenotime (c) and APS minerals replacing monazite (d) in the ST2BNR2B, ST2BNR2C and ST2BNR2D sample clasts.
